# Supplementary material
Source: PubMed Central journal article supplement (PMC6220360)
Supplement: mp8b00388_si_001.pdf [file mp8b00388_si_001.pdf]

## Supporting Information

Synergistic targeting HER2 and EGFR with a bivalent aptamer-siRNA chimera efficiently inhibits HER2-positive tumor growth

Lu Xue<sup>†</sup> § <sup>⊥</sup>, Nita J. Maihle<sup>†</sup> <sup>⊥</sup>, Xiaolin Yu <sup>†</sup>, Shou-Ching Tang <sup>‡</sup>, and Hong Yan Liu<sup>†\*</sup>

<sup>†</sup>Georgia Cancer Center, Department of Biochemistry and Molecular Biology, Medical College of Georgia, Augusta University, Augusta, GA, 30912

<sup>‡</sup> University of Mississippi Medical Center Cancer Institute, Jackson, MS 39216

§ Department of Pediatrics Hematology, the First Hospital of Jilin University, Changchun, 130021, China

\*Email: [holiu@augusta.edu](mailto:holiu@augusta.edu)

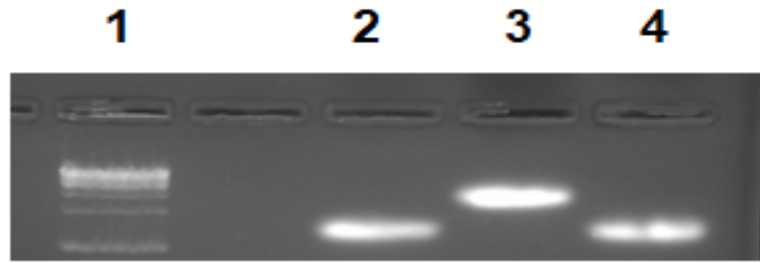

1. **MW marker**
2. **HER2 apt-EGFR siRNA sense strand**
3. **Annealed HEH**
4. **HER2 apt-EGFR siRNA anti-sense strand**

**Figure S1.** Detection of annealed HEH with 3 % agarose. To generate HEH, equal moles of HER2 aptamer-EGFR siRNA sense strand and HER2 aptamer-EGFR siRNA anti-sense strand were mixed together and heated to 95 °C for 3 min, followed by slowly cooling to room temperature. After annealing, in HEH lane, no free aptamer-EGFR siRNA sense strand or HER2 aptamer-EGFR siRNA anti-sense strand is detectable. Lane 1( L1): Molecular weight marker; L2: HER2 aptamer-EGFR siRNA sense strand; L3: annealed HEH; L4: HER2 aptamer-EGFRsiRNA anti-sense strand.

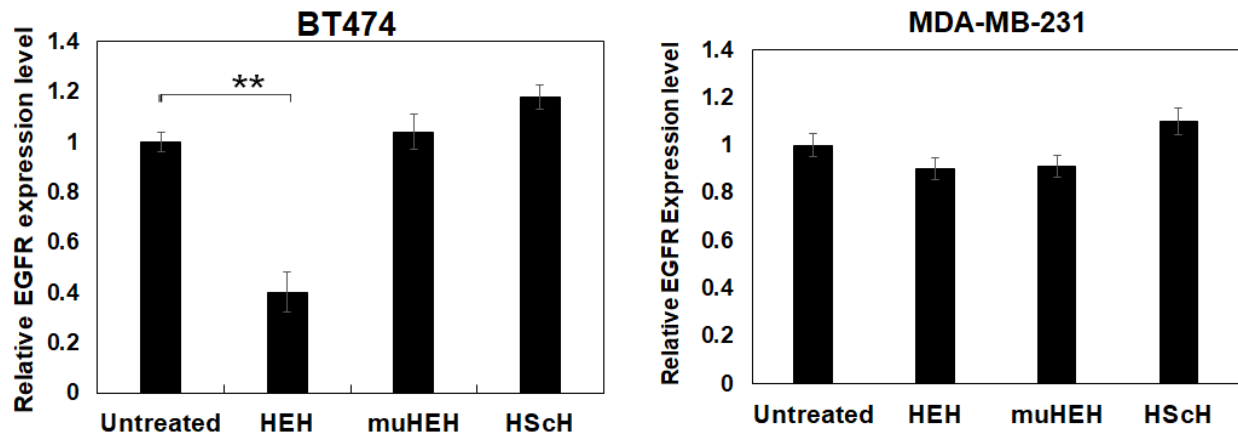

**Figure S2.** Detection of EGFR mRNA with qRT-PCR in BT474 and MDA-MB-231 cells. HER2 positive BT474 cells and HER2 negative MDA-MB-231 cells were treated with HEH, muHEH or HER2 aptamer-scrambled siRNA at 2 $\mu$ M for 48h. RNA was extracted and reverse transcribed as described in material and methods. Gene copy numbers were normalized against GAPDH. \*P< 0.05. \*\*P<0.001.

Red: Cy5 chimera; Green: lysotracker; blue: DAPI.

BT474

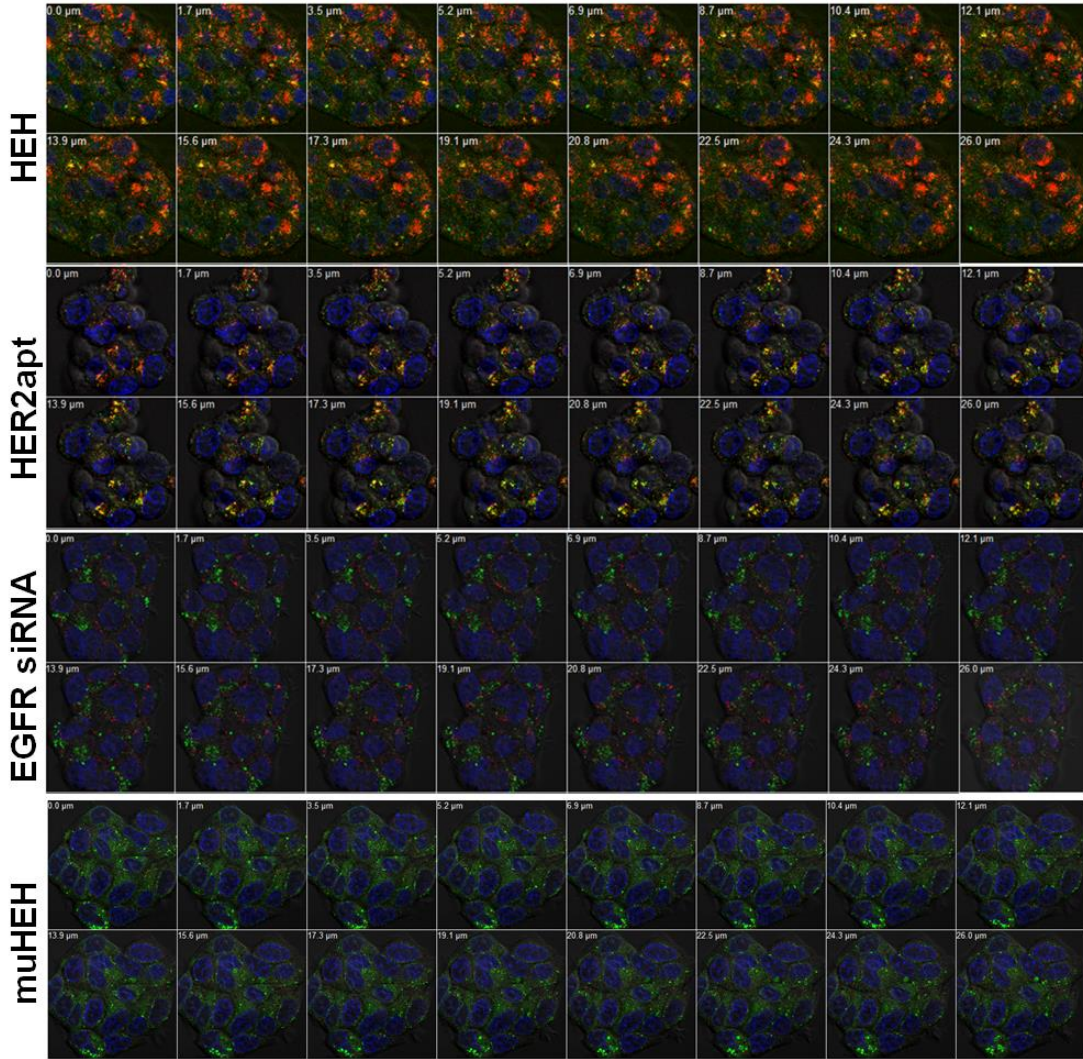

MDA-MB-231

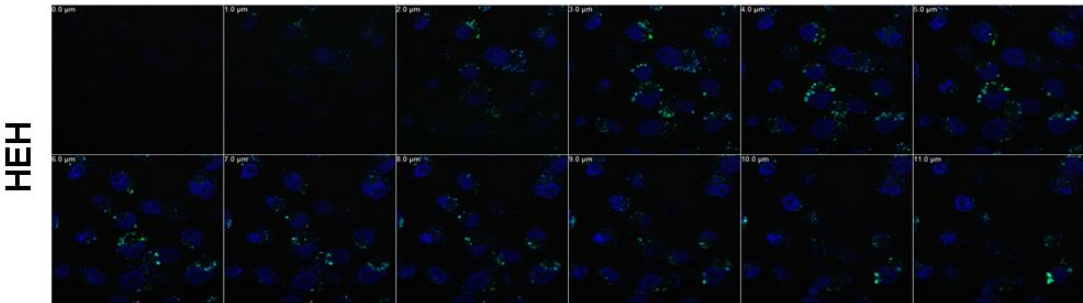

**Figure S3.** Detection of HEH internalization by Z-Stack Confocal Microscopy. Cy5-labeled HEH, EGFRsiRNA, HER2 aptamer, or muH2EH3 was individually added into BT474 cells for 12 h at 37°C. LysoTracker Green was used to show lysosomes and endosomes. DAPI was used to display nucleus. Confocal laser scanning microscopy with z stack was performed to show cell binding and internalization. As a cell control, HER2 negative MDA-MB-231 cells were treated with Cy5-HEH for 12h at 37°C and the internalization was determined with Z-stack confocal microscopy.
